# Supplementary material
Source: publisher figshare collection journal article supplement (https://acs.figshare.com/ndownloader/files/20180558)
Supplement: Supplementary file 1 [file 20180558]

## **Supplementary Information**

### **Common gene expression patterns in environmental model organisms exposed to engineered nanomaterials: a meta-analysis**

Michael Burkard<sup>1</sup>, Alexander Betz<sup>1</sup>, Kristin Schirmer<sup>1,2,3 #</sup>, Anze Zupanic<sup>1 #</sup>

<sup>1</sup> *Eawag, Swiss Federal Institute of Technology, Dübendorf, Switzerland*

<sup>2</sup> *ETH Zürich, Institute of Biogeochemistry and Pollutant Dynamics, Zürich, Switzerland*

<sup>3</sup> *EPF Lausanne, School of Architecture, Civil and Environmental Engineering, Lausanne, Switzerland*

*# Corresponding author:*

*Eawag, Swiss Federal Institute of Aquatic Science and Technology*

*Überlandstrasse 133*

*CH-8600*

*Email: Kristin.Schirmer@eawag.ch*

*Phone: +41 (0)58 765 5266*

## Table of content

|                                                                                                                   |            |
|-------------------------------------------------------------------------------------------------------------------|------------|
| <b>Table S1:</b> Nano- and environmental related studies                                                          | <b>3</b>   |
| <b>Table S2:</b> Studies considered for the meta-analysis                                                         | <b>4</b>   |
| <b>Table S3:</b> Identified GO-terms classified into main categories                                              | <b>4-7</b> |
| <b>Table S4:</b> Motivation and main finding of selected studies                                                  | <b>8</b>   |
| <b>Table S5:</b> Comparison of probe annotation update efficiency between gene id mapping and probe re-alignment. | <b>8</b>   |
| <br>                                                                                                              |            |
| <b>Figure S1:</b> Principal Component Analysis (PCA)                                                              | <b>9</b>   |
| <b>Figure S2:</b> Uncertainty estimation with respect to species                                                  | <b>10</b>  |
| <b>Figure S3:</b> Uncertainty estimation with respect to nanoparticles                                            | <b>11</b>  |
| <b>Figure S4:</b> Toxicity profiles for ENMs                                                                      | <b>12</b>  |

**Table S1:** Nano- and environmental related studies which were found in public data repositories; the metadata information indicates where the dataset can be found (GSE=GEO; E-MTAB= ArrayExpress) and the criteria if the dataset was selected for analysis.

| ID Number<br>Data base | Nanomaterial Type | Organism                    | Assay Type | Manu-<br>facturer | Concentration & duration of<br>exposure | Pipeline<br>Analysis | Deselection criteria |
|------------------------|-------------------|-----------------------------|------------|-------------------|-----------------------------------------|----------------------|----------------------|
| GSE53989               | Cadmium QD        | <i>A. thaliana</i>          | Microarray | Affymetrix        | 0, 40, 80 mg/L; 21d                     | No                   | <3 replicates        |
| GSE24847               | Carbon (MWCNTs)   | <i>C. elegans</i>           | Microarray | Affymetrix        | 1mg/L; 4&24h                            | No                   | <3 replicates        |
| GSE70842               | Carbon (MWCNTs)   | <i>S. lycopersicum</i>      | Microarray | Affymetrix        | 25 ug/ml; 1&11d                         | No                   | cDNA not available   |
| E-MTAB-3331            | Carbon (NTs)      | <i>A. thaliana</i>          | Microarray | Agilent           | 25 µg/mL; 48h                           | No                   | No probe sequences   |
| GSE22803               | Carbon (NTs)      | <i>S. lycopersicum</i>      | Microarray | Affymetrix        | 50, 100, 200 ug/ml; 10d                 | No                   | <3 replicates        |
| GSE41486               | Carbon (SWCNTs)   | <i>C. elegans</i>           | Microarray | Affymetrix        | 500 µg/mL; 48h                          | No                   | <3 replicates        |
| GSE57541               | Carbon (SWCNTs)   | <i>S. lycopersicum</i>      | Microarray | Affymetrix        | 25 ug/ml; 1&11d                         | No                   | cDNA not available   |
| E-MTAB-2454            | Cerium            | <i>C. reinhardtii</i>       | Microarray | Agilent           | 0.14 ug/l, 10g/l                        | No                   | format not readable  |
| GSE80461               | Cerium            | <i>A. thaliana</i>          | Microarray | Affymetrix        | 500 mg/L; 12, 29 days                   | Yes                  |                      |
| GSE26331               | Copper            | <i>E. albidus</i>           | Microarray | EBT UA            | 400, 600, 800, 1000 mg/kg; 48h          | No                   | no gene ontology     |
| GSE54738               | Copper            | <i>D. magna</i>             | Microarray | Agilent           | 10% immobilisation; 96 h                | No                   | no gene ontology     |
| GSE46958               | Gold              | <i>A. thaliana</i>          | Microarray | Affymetrix        | 0.125 mM; 24h                           | Yes                  |                      |
| GSE32521               | Gold              | <i>C. elegans</i>           | Microarray | Affymetrix        | LC10 (5.9 mg/L); 24 h                   | Yes                  |                      |
| GSE30275               | Gold              | <i>D. rerio</i>             | Microarray | NimbleGen         | 10,50 ug/mL (TMAT, MES); 24;48          | No                   | No probe sequences   |
| GSE41333               | PAMAM             | <i>D. rerio</i>             | Microarray | Agilent           | LC50 (1.8 and 2.3mg/L); 48 h            | Yes                  |                      |
| GSE77755               | Polystyrene       | <i>D. rerio</i>             | RNA-seq    | Illumina          | 5 mg/ml; 1;3 days                       | No                   | No raw data          |
| GSE73427               | Silica            | <i>D. rerio</i>             | Microarray | customised        | 3 mg/mL; 24h                            | Yes                  |                      |
| GSE93182               | Silica            | <i>A. thaliana</i>          | Microarray | Agilent           | 7.5 mg/L (C), 92.5 mg/L (S); 24h        | No                   | <3 replicates        |
| GSE47064               | Silica            | <i>D. magna</i>             | Microarray | Agilent           | 1/10 LC50; 24 h                         | No                   | no gene ontology     |
| E-MTAB-3331            | Silver            | <i>A. thaliana</i>          | Microarray | Agilent           | 0.2 µg/mL; 48h                          | No                   | No probe sequences   |
| GSE14932               | Silver            | <i>C. elegans</i>           | Microarray | Affymetrix        | 0.1mg/L; 24h                            | No                   | <3 replicates        |
| GSE48677               | Silver            | <i>C. reinhardtii</i>       | Microarray | customised        | 10, 100, 200 nM; 0.15, 1, 5, 16 h       | No                   | no ENMs (only ions)  |
| GSE38125               | Silver            | <i>D. rerio</i>             | RNAseq     | Illumina          | 5 µg/L; 24;48 h                         | No                   | <3 replicates        |
| GSE70509               | Silver            | <i>C. elegans</i>           | Microarray | Affymetrix        | EC30 (reproduct.); 48 h                 | Yes                  |                      |
| GSE50718               | Silver            | <i>D. rerio</i>             | Microarray | Agilent           | 20 ppB; 96 h                            | Yes                  |                      |
| GSE33488               | Silver            | <i>O. latipes</i>           | Microarray | customised        | 0.05 mg/L; 48 h                         | No                   | no gene ontology     |
| GSE64259               | Silver            | <i>P. promelas</i>          | Microarray | Agilent           | 6 µg/L; 96 h                            | No                   | no gene ontology     |
| GSE35150               | Silver            | <i>D. magna</i>             | Microarray | Agilent           | 0.43,1, 3.5,8 ug/l; 24 h                | No                   | no gene ontology     |
| GSE42431               | Silver            | <i>E. albidus</i>           | Microarray | Agilent           | 100; 200 mg/kg; 2d                      | No                   | no gene ontology     |
| NERC unpubl.           | Silver            | <i>C. elegans</i>           | Microarray | Affymetrix        | EC50; 96 h                              | Yes                  |                      |
| GSE61186               | Silver            | <i>D. rerio</i>             | Microarray | Agilent           | 0.01 mg/L; 15d                          | Yes                  |                      |
| MTAB-4041              | Silver            | <i>D. magna</i>             | Microarray | Agilent           | 1.18 µg/l, 4.70 µg/l; 24h               | No                   | no gene ontology     |
| PRJEB7919              | Silver            | <i>E. fetida</i>            | RNA-seq    | HiSeq             | EC50; 28 d                              | No                   | no gene ontology     |
| GSE46520               | Silver            | <i>P. promelas</i>          | Microarray | Agilent           | 70 µg/L; 96 h                           | No                   | no gene ontology     |
| E-MEXP-3950            | Silver            | <i>A. thaliana</i>          | Microarray | Affymetrix        | 5 mg/l; 10d                             | No                   | No probe sequences   |
| E-MTAB-3331            | Titanium          | <i>A. thaliana</i>          | Microarray | Agilent           | 20 µg/mL; 48h                           | No                   | Duplicates in data   |
| GSE80461               | Titanium          | <i>A. thaliana</i>          | Microarray | Affymetrix        | 500 mg/L; 12;29 d                       | Yes                  |                      |
| GSE59519               | Titanium          | <i>C. elegans</i>           | Microarray | Agilent           | 0.01, 0.1, 1 mg/L; 24h                  | No                   | No raw data          |
| GSE59470               | Titanium          | <i>C. elegans</i>           | Microarray | Agilent           | 0.01, 0.1, 1 mg/L; 24h                  | No                   | No raw data          |
| GSE95603               | Titanium          | <i>C. elegans</i>           | Microarray | Affymetrix        | 500µg/ml; n.a.                          | No                   | <3 replicates        |
| GSE69867               | Titanium          | <i>M. galloprovincialis</i> | Microarray | customised        | n.a.                                    | No                   | no gene ontology     |
| GSE77148               | Zinc              | <i>D. rerio</i>             | Microarray | Agilent           | LC25; 96h                               | Yes                  |                      |
| GSE54736               | Zinc              | <i>D. magna</i>             | Microarray | Agilent           | 10% (immob.); 96 h                      | No                   | no gene ontology     |
| GSE22051               | Zinc              | <i>D. magna</i>             | Microarray | customised        | 1/10 LC50, LC25; 24 h                   | No                   | <3 replicates        |
| GSE49136               | Zinc              | <i>H. azteca</i>            | Microarray | customised        | 1/10 LC50, LC25; 96 h                   | No                   | no gene ontology     |
| GSE46947               | Zinc              | <i>P. aeruginosa</i>        | Microarray | Affymetrix        | 1 mM; 5h                                | No                   | <3 replicates        |

**Table S2:** Studies considered for the meta-analysis.

| Nanomaterial Type | Organism           | Concentration & duration            | Assay Type    | ID Number Data base | Platform ID |
|-------------------|--------------------|-------------------------------------|---------------|---------------------|-------------|
| <b>Cerium</b>     | <i>A. thaliana</i> | 500 mg/L (non-coated); 12, 29 d     | MA;Affymetrix | GSE80461            | GPL198      |
| <b>Titanium</b>   | <i>A. thaliana</i> | 500 mg/L (non-coated); 12, 29 d     | MA;Affymetrix | GSE80461            | GPL198      |
| <b>Gold</b>       | <i>A. thaliana</i> | 0.125 mM (AuO); 24h                 | MA;Affymetrix | GSE46958            | GPL198      |
| <b>Gold</b>       | <i>C. elegans</i>  | LC10 (5.9 mg/L)(citrate-Au); 24 h   | MA;Affymetrix | GSE32521            | GPL200      |
| <b>Silver</b>     | <i>C. elegans</i>  | EC30 (reproduction); 48 h           | MA;Affymetrix | GSE70509            | GPL200      |
| <b>Silver</b>     | <i>C. elegans</i>  | EC15 (Unf, PVP, PVP, MUA, AUT); 48h | MA; Agilent   | NERC unpub.         | GPL10094    |
| <b>Silica</b>     | <i>D. rerio</i>    | 3 mg/mL; 24h                        | MA;custom.    | GSE73427            | GPL16933    |
| <b>Silver</b>     | <i>D. rerio</i>    | 0.01 mg/L; 15 d                     | MA;Agilent    | GSE61186            | GPL14664    |
| <b>Zinc</b>       | <i>D. rerio</i>    | LC25 (ZnO, ZnSO <sub>4</sub> ); 96h | MA;Agilent    | GSE77148            | GPL21361    |
| <b>Silver</b>     | <i>D. rerio</i>    | 20 ppB; AgNPs (50, and 150nm); 96 h | MA;Agilent    | GSE50718            | GPL14664    |
| <b>PAMAM</b>      | <i>D. rerio</i>    | LC50 (1.8 and 2.3mg/L); 48 h        | MA;Agilent    | GSE41333            | GPL14688    |

**Table S3:** Identified GO-terms classified into main categories.

|                |                                             |
|----------------|---------------------------------------------|
| Cytoskeleton   |                                             |
| GO:0046854     | phosphatidylinositol phosphorylation        |
| GO:0007015     | actin filament organization                 |
| GO:0030239     | myofibril assembly                          |
| GO:0031109     | microtubule polymerization or depolymeri... |
| GO:0051693     | actin filament capping                      |
| GO:0031110     | regulation of microtubule polymerization... |
|                |                                             |
| DNA metabolism |                                             |
| GO:1901068     | guanosine-containing compound metabolic ... |
| GO:0009263     | deoxyribonucleotide biosynthetic process    |
| GO:0072528     | pyrimidine-containing compound biosynthe... |
| GO:0001522     | pseudouridine synthesis                     |
| GO:0031497     | chromatin assembly                          |
| GO:0046112     | nucleobase biosynthetic process             |
| GO:0009206     | purine ribonucleoside triphosphate biosy... |
| GO:0009116     | nucleoside metabolic process                |
| GO:0006144     | purine nucleobase metabolic process         |
| GO:0019359     | nicotinamide nucleotide biosynthetic pro... |
|                |                                             |
| DNA repair     |                                             |
| GO:0006281     | DNA repair                                  |
| GO:0006298     | mismatch repair                             |
| GO:0000724     | double-strand break repair via homologou... |
|                |                                             |
| AA metabolism  |                                             |
| GO:0006575     | cellular modified amino acid metabolic p... |

|                        |                                             |
|------------------------|---------------------------------------------|
| GO:0015807             | L-amino acid transport                      |
| GO:0009069             | serine family amino acid metabolic proce... |
| GO:0006568             | tryptophan metabolic process                |
|                        |                                             |
| Catabolism             |                                             |
| GO:1901606             | alpha-amino acid catabolic process          |
| GO:0043171             | peptide catabolic process                   |
| GO:0016042             | lipid catabolic process                     |
| GO:0044273             | sulfur compound catabolic process           |
| GO:0044248             | cellular catabolic process                  |
| GO:0044242             | cellular lipid catabolic process            |
| GO:0046434             | organophosphate catabolic process           |
| GO:0019439             | aromatic compound catabolic process         |
| GO:0046700             | heterocycle catabolic process               |
| GO:0009063             | cellular amino acid catabolic process       |
| GO:0044270             | cellular nitrogen compound catabolic pro... |
| GO:1901361             | organic cyclic compound catabolic proces... |
| GO:0006032             | chitin catabolic process                    |
|                        |                                             |
| Ion membrane transport |                                             |
| GO:0071577             | zinc II ion transmembrane transport         |
| GO:0071805             | potassium ion transmembrane transport       |
| GO:0034765             | regulation of ion transmembrane transpor... |
| GO:0070588             | calcium ion transmembrane transport         |
| GO:0010959             | regulation of metal ion transport           |
| GO:0070838             | divalent metal ion transport                |
|                        |                                             |
| Energy conversion      |                                             |
| GO:0042775             | mitochondrial ATP synthesis coupled elec... |
| GO:0006099             | tricarboxylic acid cycle                    |
| GO:0006730             | one-carbon metabolic process                |
| GO:0033108             | mitochondrial respiratory chain complex ... |
| GO:0072330             | monocarboxylic acid biosynthetic process    |
| GO:0017004             | cytochrome complex assembly                 |
| GO:0019674             | NAD metabolic process                       |
| GO:0006739             | NADP metabolic process                      |
| GO:0043648             | dicarboxylic acid metabolic process         |
| GO:0043462             | regulation of ATPase activity               |
| GO:0015986             | ATP synthesis coupled proton transport      |
| GO:0046034             | ATP metabolic process                       |
| GO:0099132             | ATP hydrolysis coupled cation transmembr... |
| GO:0006084             | acetyl-CoA metabolic process                |

|                                 |                                             |
|---------------------------------|---------------------------------------------|
| GO:0006094                      | gluconeogenesis                             |
| GO:0006096                      | glycolytic process                          |
| GO:0006006                      | glucose metabolic process                   |
| GO:0043547                      | positive regulation of GTPase activity      |
|                                 |                                             |
| Regulation of energy metabolism |                                             |
| GO:0071901                      | negative regulation of protein serine/th... |
|                                 |                                             |
| Cell growth inhibition          |                                             |
| GO:0030308                      | negative regulation of cell growth          |
| GO:0001708                      | cell fate specification                     |
|                                 |                                             |
| Translation                     |                                             |
| GO:0000398                      | mRNA splicing, via spliceosome              |
| GO:0000027                      | ribosomal large subunit assembly            |
| GO:0006412                      | translation                                 |
| GO:0032543                      | mitochondrial translation                   |
| GO:0042254                      | ribosome biogenesis                         |
| GO:0006418                      | tRNA aminoacylation for protein translat... |
| GO:0006413                      | translational initiation                    |
| GO:0002181                      | cytoplasmic translation                     |
| GO:0042273                      | ribosomal large subunit biogenesis          |
|                                 |                                             |
| Protein Folding                 |                                             |
| GO:0006457                      | protein folding                             |
| GO:0061077                      | chaperone-mediated protein folding          |
| GO:0006458                      | 'de novo' protein folding                   |
|                                 |                                             |
| Response to misfolded proteins  |                                             |
| GO:0035966                      | response to topologically incorrect prot... |
| GO:0006986                      | response to unfolded protein                |
| GO:0030968                      | endoplasmic reticulum unfolded protein r... |
|                                 |                                             |
| Transcription                   |                                             |
| GO:0006383                      | transcription from RNA polymerase III pr... |
| GO:0045944                      | positive regulation of transcription fro... |
| GO:0006352                      | DNA-templated transcription, initiation     |
| GO:0006355                      | regulation of transcription, DNA-templat... |
|                                 |                                             |
| Signalling general              |                                             |
| GO:0030111                      | regulation of Wnt signaling pathway         |
| GO:0007186                      | G-protein coupled receptor signaling pat... |

|                   |                                             |
|-------------------|---------------------------------------------|
| GO:0010817        | regulation of hormone levels                |
| GO:0008593        | regulation of Notch signaling pathway       |
| GO:0007210        | serotonin receptor signaling pathway        |
| GO:0009581        | detection of external stimulus              |
| GO:0009582        | detection of abiotic stimulus               |
| GO:0050906        | detection of stimulus involved in sensor... |
| GO:0050911        | detection of chemical stimulus involved ... |
| GO:0043405        | regulation of MAP kinase activity           |
| GO:0043401        | steroid hormone mediated signaling pathw... |
| O:0010469         | regulation of receptor activity             |
|                   |                                             |
| Methylation       |                                             |
| GO:0001510        | RNA methylation                             |
| GO:0032259        | methylation                                 |
|                   |                                             |
| Defense           |                                             |
| GO:0050832        | defense response to fungus                  |
| GO:0010038        | response to metal ion                       |
|                   |                                             |
| Oxidative stress  |                                             |
| GO:0070482        | response to oxygen levels                   |
| GO:0055114        | oxidation-reduction process                 |
| GO:0072593        | reactive oxygen species metabolic proces... |
| GO:0036293        | response to decreased oxygen levels         |
| GO:0045454        | cell redox homeostasis                      |
|                   |                                             |
| Neuronal activity |                                             |
| GO:0016079        | synaptic vesicle exocytosis                 |
| GO:0007608        | sensory perception of smell                 |
| GO:0007413        | axonal fasciculation                        |
| GO:0007268        | chemical synaptic transmission              |
| GO:0060079        | excitatory postsynaptic potential           |
| GO:0050808        | synapse organization                        |
| GO:0048666        | neuron development                          |
| GO:0031175        | neuron projection development               |
| GO:0008045        | motor neuron axon guidance                  |
| GO:0022008        | neurogenesis                                |
| GO:0048699        | generation of neurons                       |
| GO:0045664        | regulation of neuron differentiation        |
| GO:0050767        | regulation of neurogenesis                  |

**Table S4:** Motivation and main finding of selected studies.

| Study       | Main objective                                                                                      | Finding                                                                                                                                                                                                    | Toxicological effect                                                       |
|-------------|-----------------------------------------------------------------------------------------------------|------------------------------------------------------------------------------------------------------------------------------------------------------------------------------------------------------------|----------------------------------------------------------------------------|
| GSE80461    | Investigation of the mechanisms associated with plant growth and development.                       | Nano-ceria had more differentially expressed genes in roots and induced expression of genes related to activating transcription factors (ethylene responsive element binding protein family).              | No effects visible.                                                        |
| GSE80461    | Investigation of the mechanisms associated with plant growth and development.                       | Nano-titania induced more differentially expressed genes in rosette leaves and induced genes associated with photosynthesis.                                                                               | Increase of the number of rosette leaves.                                  |
| GSE46958    | Monitoring of candidate genes involved in metal uptake and transport.                               | A discreet number of genes known to be involved in the transport of copper, cadmium, nickel and iron were down-regulated.                                                                                  | Effect on seedling root length.                                            |
| GSE32521    | Assessment of particle specific effects and associated biological pathways.                         | Several genes which are indicative for endoplasmic reticulum stress, protective mechanisms, apoptosis and necrosis were regulated.                                                                         | Effect on mortality (EC10).                                                |
| GSE70509    | Assessment of the transcriptomic response of pristine and artificially aged particles.              | No description available.                                                                                                                                                                                  | No information available.                                                  |
| NERC unpub. | Investigation of the modes of action of different Ag-NPs with different physicochemical properties. | Distinctive response patterns were found for different NPs, whereby neurotoxic effects were of concern for all types. Commercially produced NPs affected other functions.                                  | Effect on reproduction (EC15).                                             |
| GSE73427    | Investigation of the toxic effect and mechanisms.                                                   | Several pathways were found to be regulated including vascular smooth muscle contraction, metabolic pathways, apoptosis, MAPK signaling pathway, calcium signaling pathway and JAK-STAT signaling pathway. | No Observed Adverse Effect Level.                                          |
| GSE61186    | Transcriptional profiling.                                                                          | No description available.                                                                                                                                                                                  | No information available.                                                  |
| GSE77148    | Identification of expression profiles and modes of action.                                          | Go terms related to (GPCR)-signaling pathways, cell-surface receptor-linked signal transduction and immune response were enriched.                                                                         | Effect on tail malformation, pericardial edema, and yolk-sac edema (LC25). |
| GSE50718    | Transcription of different sized AgNPs to differentiate their modes of toxicity.                    | Immune response, antigen processing and presentation, response to estradiol stimulus and regulation of RNA metabolic process were found as significant Go terms.                                           | No information available.                                                  |
| GSE41333    | Expression profiling between two different polyamidoamine dendrimers.                               | 5% of genes were affected. Genes were involved in oxidation-reduction processes and in the nervous system development.                                                                                     | Effect on survival (EC10).                                                 |

**Table S5:** Comparison of probe annotation update efficiency between gene id mapping and probe re-alignment. The percent of probes that could not be matched to up-to-date Ensembl gene annotations are shown. GPL16933 has a newer array design that uses a varying number of probes per target (mean=1.44).

| Series ID | Platform ID | Organism           | Microarray Manufacturer | ID Mapping | Probe Re-alignment | Number of Probes | Probes per target |
|-----------|-------------|--------------------|-------------------------|------------|--------------------|------------------|-------------------|
| GSE80461  | GPL198      | <i>A. thaliana</i> | Affymetrix              | 5.7%       | 6.3%               | 250'206          | 11                |
| GSE46958  | GPL198      | <i>A. thaliana</i> | Affymetrix              | 5.7%       | 6.3%               | 250'206          | 11                |
| GSE32521  | GPL200      | <i>C. elegans</i>  | Affymetrix              | 6.9%       | 5.9%               | 248'028          | 11                |
| GSE70509  | GPL200      | <i>C. elegans</i>  | Affymetrix              | 6.9%       | 5.9%               | 248'028          | 11                |
| GSE73427  | GPL16933    | <i>D. rerio</i>    | Affymetrix              | 30.6%      | 31.0%              | 1'258'175        | 1-190             |
| GSE61186  | GPL14664    | <i>D. rerio</i>    | Agilent                 | 25.6%      | 19.0%              | 43'663           | 1                 |
| GSE77148  | GPL21361    | <i>D. rerio</i>    | Agilent                 | 26.0%      | 19.1%              | 43'659           | 1                 |
| GSE50718  | GPL14664    | <i>D. rerio</i>    | Agilent                 | 25.6%      | 19.0%              | 43'663           | 1                 |
| GSE41333  | GPL14688    | <i>D. rerio</i>    | Agilent                 | 28.0%      | 19.9%              | 45'220           | 1                 |



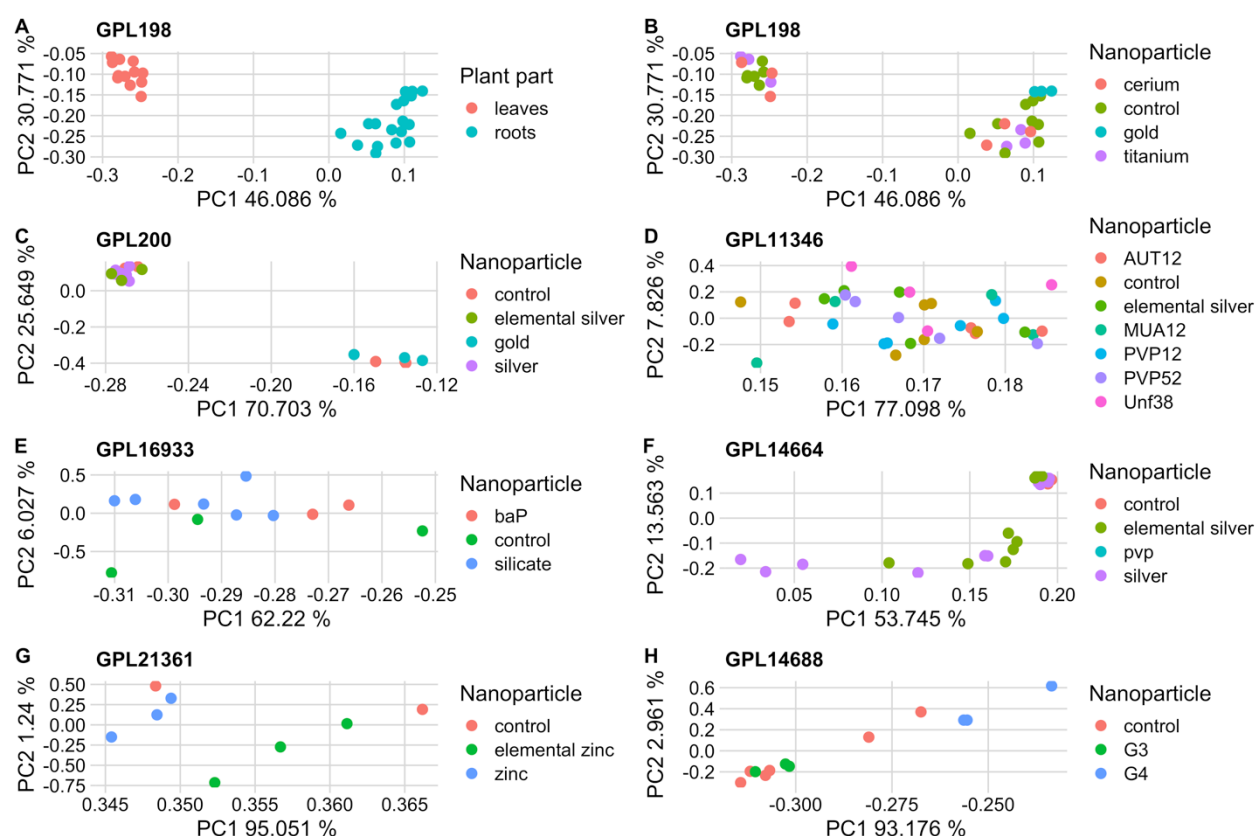

**Figure S1: Principal Component Analysis (PCA)**

PCA was applied to investigate the variability in gene expression between the different treatments of the model organisms *A.thaliana*, *C.elegans* and *D.rerio*. The 500 genes with the highest variance across all samples were used for the PCA. The distance between points (treatment samples) emphasizes the variation of the gene expression profile. *A.thaliana* samples were analysed with the platform GPL198. Points are colored with respect to the different sample sources (A) and nanoparticles (B-H). For *C.elegans*, the platforms GPL200(C) and GPL11346(D) are shown and for *D.rerio* the platforms GPL16933(E), GPL14664(F), GPL21361(G) and GPL14688(H) are shown. The axis labels show the percent variance explained.

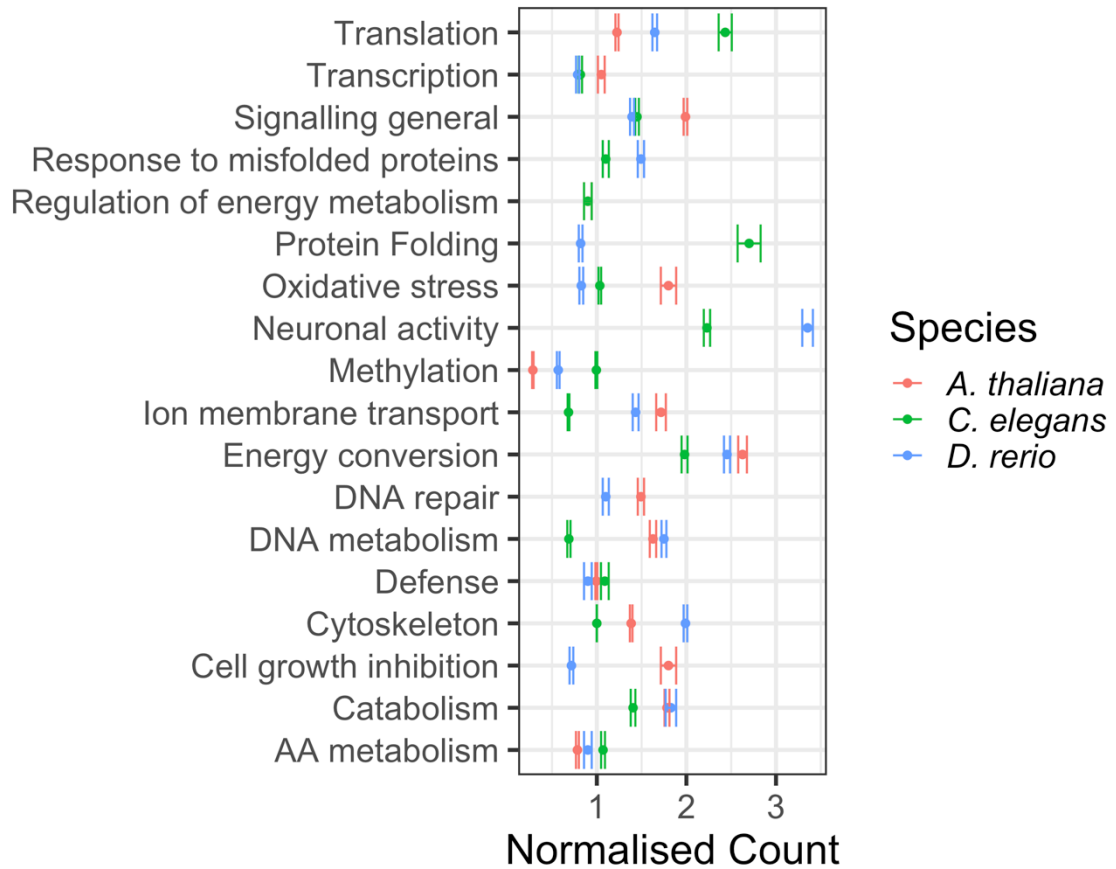

**Figure S2:** Uncertainty estimation with respect to species

To estimate the uncertainty of our analysis, we deleted 10% of all samples from our dataset and re-ran the analysis. We repeated this process for all combinations of samples and from this distribution we calculated 95% confidence intervals of the result metrics. The sum of shared GO-terms per category divided by the number of comparisons considered for the respective species is shown along with the corresponding confidence intervals.

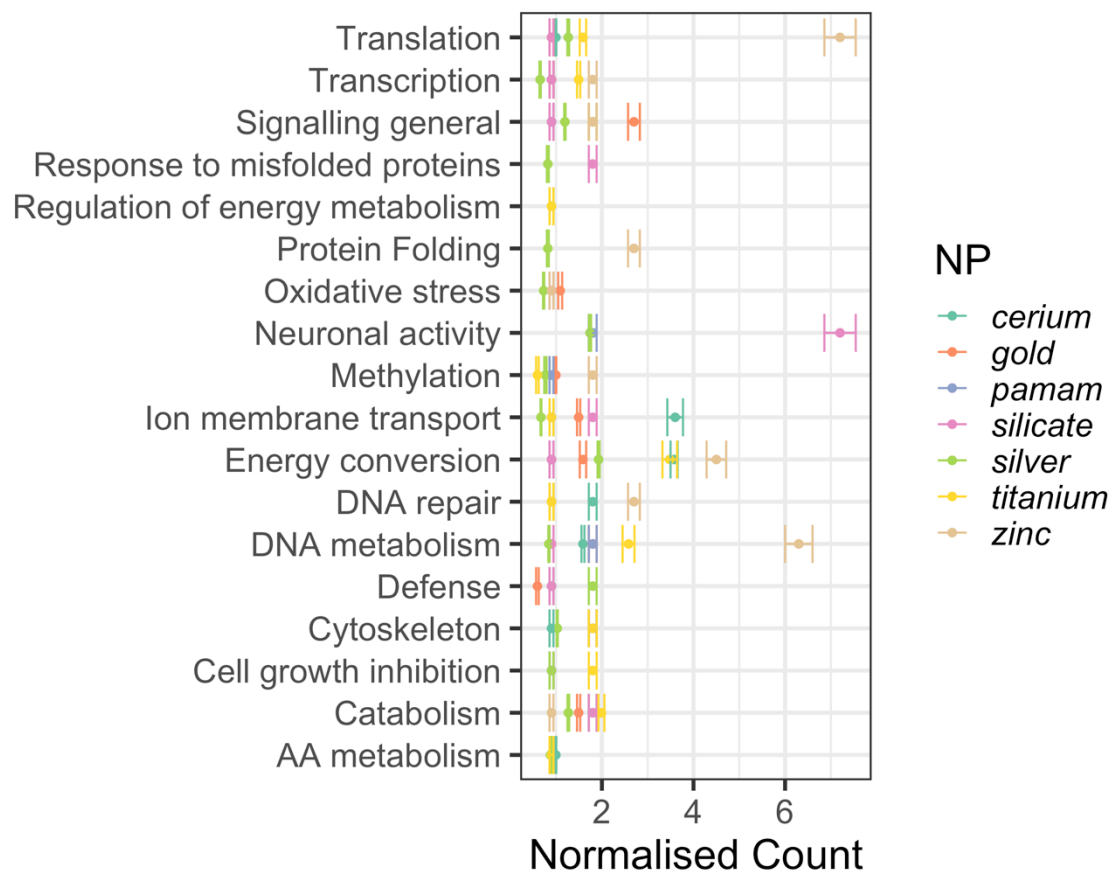

**Figure S3:** Uncertainty estimation with respect to nanoparticle type

The sum of shared GO-terms per category divided by the number of comparisons considered for the respective nanoparticle is shown along with the corresponding confidence intervals.

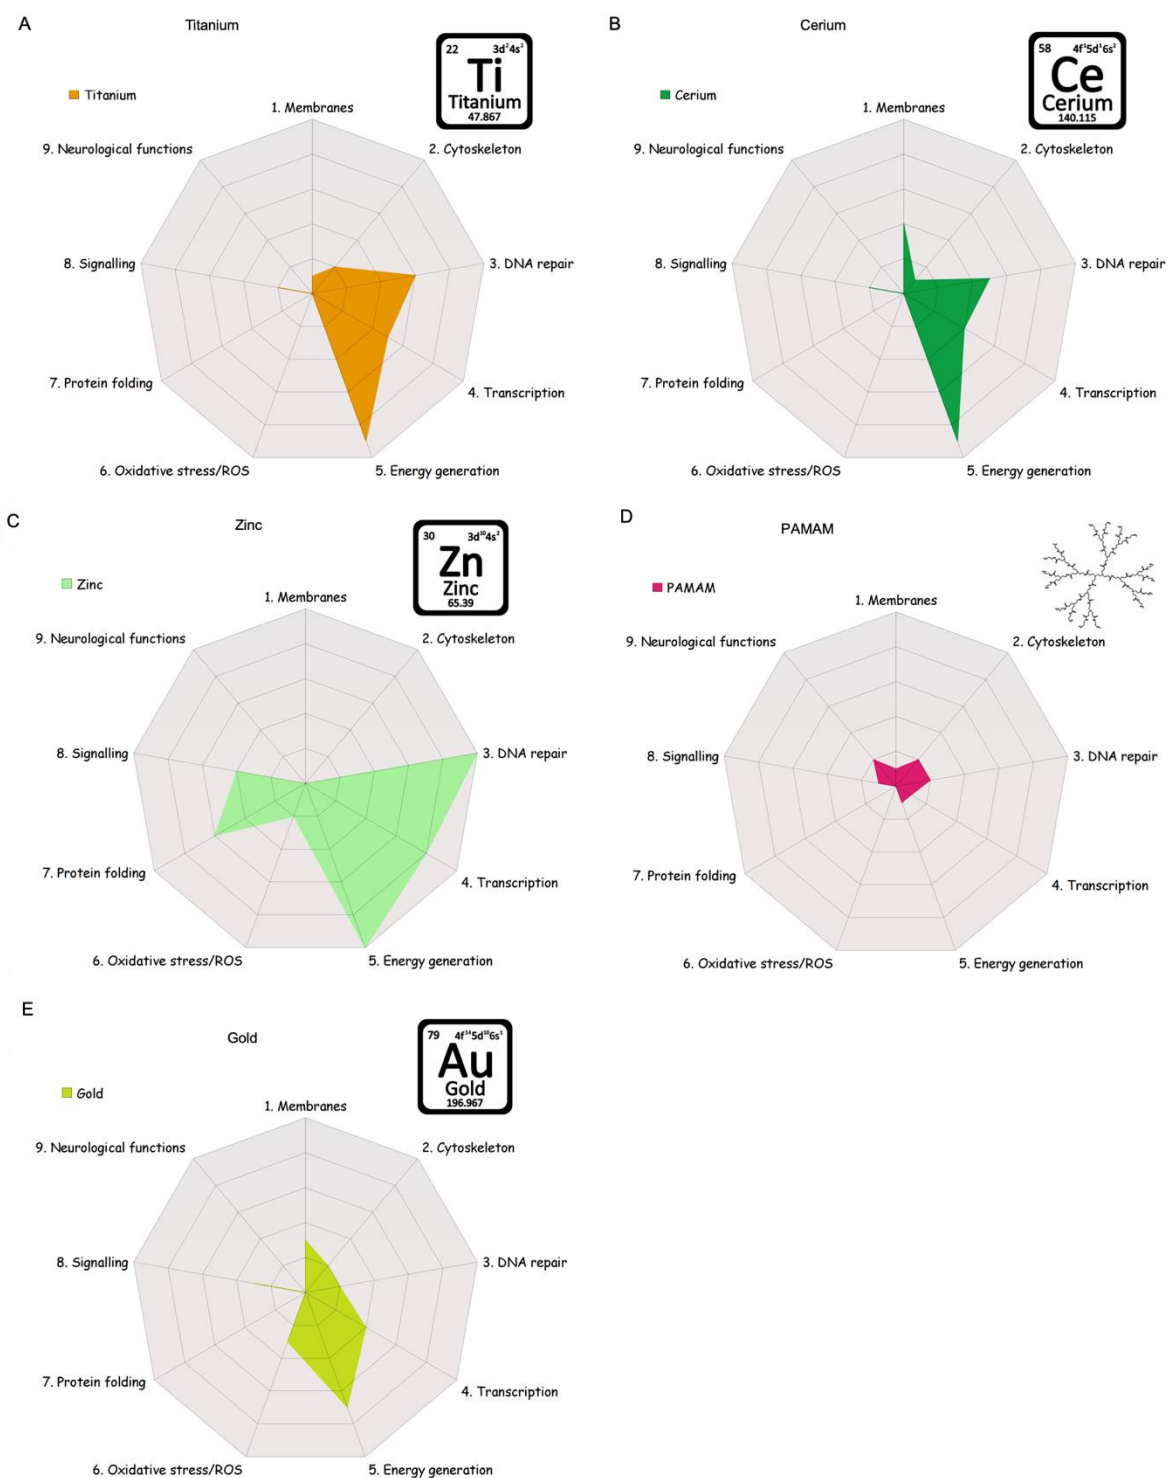

**Figure S4:** Toxicity profiles for ENMs

The response profiles were determined by assessment of the number of enriched functional annotations (GO-terms) associated with respective common toxicity mechanisms illustrated as general profile for titanium (A), cerium (B), zinc (C), PAMAM (D), gold (E). The score values indicate the number of functional annotations which were found for each category and is normalised to the number of tested contrasts for each organism.
